# Supplementary material for: An unusual origin of a ZW sex chromosome system
Source: Research Square preprint supplement (doi:10.21203/rs.3.rs-2129351/v1), 2022-10-05
Supplement: Supplementary file 1 [file 4fd365f578dd660a7215d668.xlsx]

## Sheet: Table S1
Table S1. Sex-associated positions of S. exigua when mapping to S. exigua and S. purpurea reference genome using genome-wide association study.
S. exigua		S. purpurea
Chromosome	Positions	Chromosome	Positions
Chr15	1879509	Chr15	4371403
Chr15	1879535	Chr15	4371446
Chr15	1880663	Chr15	4371447
Chr15	1880734	Chr15	6058824
Chr15	1880762	Chr15	6059052
Chr15	1880951	Chr15	6142774
Chr15	1920149	Chr15	6176639
Chr15	1920162	Chr15	6176644
Chr15	1920174	Chr15	6176651
Chr15	1935251	Chr15	6177092
Chr15	1935265	Chr15	6179423
Chr15	1935387	Chr15	6179433
Chr15	1963778	Chr15	6180891
Chr15	1963951	Chr15	6182439
Chr15	1963972	Chr15	6182464
Chr15	1964010	Chr15	6182482
Chr15	1966175	Chr15	6277500
Chr15	1966185	Chr15	6278535
Chr15	1971912	Chr15	6278738
Chr15	1976401	Chr15	6278768
		Chr15	6278898
		Chr15	6291793
		Chr15	6310577
		Chr15	6334238
		Chr15	6341283
		Chr15	6468236
		Chr15	7230364
		Chr15	7289395
		Chr15	7289429
		Chr15	7289474
		Chr15	7289548
		Chr15	7289549
		Chr15	7289579
		Chr15	7289612
		Chr15	7308166
		Chr15	7308168
		Chr15	7308551
		Chr15	7334961
		Chr15	7338339
		Chr15	7338400
		Chr15	7338458
		Chr15	7346556
		Chr15	7352217
		Chr15	7367995
		Chr15	7373897
		Chr15	7386767
		Chr15	7386997
		Chr15	7387078
		Chr15	7387090
		Chr15	7387207
		Chr15	7387396
		Chr15	7500792
		Chr15	7549933
		Chr15	7549945
		Chr15	7549947
		Chr15	7549953
		Chr15	7549987
		Chr15	7566122
		Chr15	7566145
		Chr15	7580229
		Chr15	7580404
		Chr15	7580406
		Chr15	7582930
		Chr15	7583060
		Chr15	7583076
		Chr15	7595330

## Sheet: Table S2
Table S2. Contigs assembled to Chromosome 15 in S. exigua male (#SE967M) with Hi-C interacting map.
Nanopore contig name	Length of contig assembled to Chr15	Cumulative assembled length on Chr15
contig_9968_:::fragment_2	208690	208690
RC_contig_511_:::fragment_2	946795	1155485
RC_contig_7412_	15845	1171330
RC_contig_7414_	17802	1189132
RC_contig_627_	323130	1512262
contig_10417_:::fragment_2	120260	1632522
contig_9706_	23729	1656251
RC_contig_7417_:::fragment_2	21060	1677311
RC_contig_7415_	195909	1873220
RC_contig_7425_	16422	1889642
contig_7422_	23549	1913191
RC_contig_7428_:prefix	62747	1975938
RC_contig_7431_	186293	2162231
RC_contig_7440_	19921	2182152
contig_6720_	19347	2201499
contig_7441_:prefix	69415	2270914
RC_contig_7443_	95354	2366268
contig_620_:prefix	64636	2430904
contig_1139_	34936	2465840
contig_11007_	231306	2697146
RC_contig_11008_	236921	2934067
contig_637_	178030	3112097
contig_1236_	31611	3143708
contig_9826_	15984	3159692
RC_contig_4315_	806301	3965993
contig_10426_	17135	3983128
RC_contig_10291_:::fragment_2	20381	4003509
contig_11363_:::fragment_2	25000	4028509
RC_contig_760_	188822	4217331
RC_contig_8339_:::fragment_1	266516	4483847
contig_8347_	16475	4500322
RC_contig_8339_:::fragment_3	727192	5227514
contig_4268_	371872	5599386
RC_contig_11196_	19735	5619121
contig_7485_	310438	5929559
contig_7482_	18775	5948334
RC_contig_4471_	174017	6122351
contig_1784_	172322	6294673
contig_6842_	19326	6313999
RC_contig_1786_	106182	6420181
RC_contig_5976_	17164	6437345
contig_5603_:::fragment_2	120822	6558167
RC_contig_4569_	920210	7478377
RC_contig_3990_	101492	7579869
contig_3987_:prefix:prefix	98766	7678635
contig_3981_:::fragment_3	16000	7694635
RC_contig_1715_:prefix:prefix	299804	7994439
contig_3981_:::fragment_1	19645	8014084
RC_contig_1576_	84771	8098855
RC_contig_5604_:::fragment_2	91582	8190437
RC_contig_2745_	17912	8208349
contig_3918_	749795	8958144
contig_2456_	110733	9068877
RC_contig_763_:prefix	51703	9120580
RC_contig_10360_:prefix	49279	9169859
RC_contig_10362_	144447	9314306
RC_contig_10374_	30615	9344921
RC_contig_10378_	62461	9407382
RC_contig_11017_	85903	9493285
RC_contig_4078_	22352	9515637
contig_10381_	21547	9537184
RC_contig_10383_:::fragment_1	135564	9672748
contig_10383_:::fragment_3	37273	9710021
contig_4079_:::fragment_2	49942	9759963
contig_734_:::fragment_2	15166	9775129
contig_10284_:::fragment_1	31616	9806745
RC_contig_10267_:::fragment_1	16183	9822928
RC_contig_3790_	1017260	10840188
RC_contig_5899_:::fragment_1	24116	10864304
RC_contig_1676_:::fragment_2:prefix	320608	11184912
RC_contig_6747_	23274	11208186
contig_6741_	21855	11230041
contig_1734_:::fragment_3	522320	11752361
RC_contig_10399_	18647	11771008
contig_1734_:::fragment_1	181361	11952369
contig_693_:::fragment_3	52185	12004554
contig_8694_	17978	12022532
contig_693_:::fragment_1	276857	12299389
RC_contig_8684_	18820	12318209
contig_1020_	226351	12544560
contig_236_	668429	13212989
RC_contig_303_:::fragment_1	368541	13581530

## Sheet: Table S3
Table S3. Colinearity between Contig 511 of S. exigua and Chr15Z of S. purpurea.
Contig 511 of S.exigua			Chr15Z of S. purpurea
Start	End	Direction	Start	End	Direction
5854	7005	+	5965092	5966240	+
7035	7577	+	4595070	4595610	+
8548	12280	+	4416053	4419788	+
12941	13409	+	4506590	4507055	+
15153	15968	+	4743089	4743807	-
19812	20030	+	4828418	4828635	-
26537	28034	+	4735356	4736887	-
39514	40485	+	4620056	4621022	-
75385	77143	+	4628203	4630014	-
93588	94183	+	4625472	4626067	-
99930	102351	+	4622396	4624829	-
106068	106326	+	4654235	4654493	-
106395	106778	+	7203416	7203797	+
107608	111254	+	7204635	7208282	+
111466	112085	+	4654494	4655113	+
112086	113089	+	4750308	4751348	-
115457	115790	+	4653140	4653473	-
126563	127372	+	4769522	4770344	-
133500	133697	+	4646923	4647120	-
133710	135003	+	4740729	4742019	-
136210	143400	+	4727827	4735106	-
143420	148108	+	4721369	4726086	-
150147	154079	+	4717432	4721366	-
159113	166127	+	4710331	4717431	-
166131	171396	+	3488913	3494016	-
171914	172444	+	4707440	4707970	-
177690	178959	+	4706170	4707439	-
178961	179410	+	4704997	4705445	-
184682	184996	+	4704695	4704994	-
185787	187700	+	5958145	5960016	+
189341	189657	+	5961689	5962017	+
197345	199321	+	4450280	4452227	+
201242	203315	+	4374812	4376843	-
204450	204751	+	4367328	4367620	-
205108	205511	+	4462990	4463393	-
206047	209838	+	4831560	4835421	-
213149	213593	+	5401289	5401733	-
214308	214431	+	4332247	4332378	-
215795	217937	+	4824069	4826216	-
217939	224463	+	4844067	4850622	-
238135	238256	+	6277817	6277952	-
246789	247095	+	3004064	3004333	-
260399	261064	+	6158709	6159358	-
261507	261636	+	5226932	5227062	+
265163	265330	+	6157137	6157304	-
269828	270100	+	6143985	6144250	-
271195	271478	+	6142646	6142885	-
288078	288162	+	5405090	5405184	+
306388	307669	+	6126426	6127708	-
307673	307750	+	6381768	6381845	+
314423	317100	+	6086234	6088954	-
317101	319660	+	6075387	6077961	-
329142	330312	+	6064613	6065838	-
330323	331228	+	6057165	6058161	-
336611	337383	+	5710637	5711383	-
345950	346264	+	5948886	5949200	+
349239	351400	+	6049619	6051846	-
351401	352071	+	6048591	6049321	-
355423	355539	+	3701410	3701523	+
365972	366410	+	4095619	4096051	-
371886	371997	+	4876012	4876116	+
377892	378268	+	6048212	6048590	-
378994	380959	+	6045115	6047261	-
381499	381912	+	6041829	6042273	-
381913	383684	+	6037773	6039511	-
392767	397377	+	6027453	6032272	-
397378	401081	+	6023283	6027002	-
401499	401801	+	6022546	6022847	-
410329	410827	+	3282927	3283418	+
421745	422598	+	6014434	6015311	-
426786	427053	+	7465191	7465459	+
438136	439797	+	6004982	6006606	-
468552	472768	+	5999002	6003243	-
476180	476456	+	3116370	3116639	-
479815	483748	+	3540777	3544714	-
483751	483828	+	5990855	5990932	-
523158	531751	+	5974723	5983423	-
539698	539866	+	5973331	5973512	-
570285	572414	+	5928509	5930658	-
579758	580679	+	5921604	5922570	-
580686	580957	+	5921141	5921400	-
585059	585120	+	3277450	3277511	+
587240	587860	+	5858952	5859574	+
614152	615202	+	4667052	4668115	-
615203	619118	+	5866615	5870647	+
619427	619699	+	5872538	5872831	+
623377	624459	+	4609672	4610773	-
624462	624619	+	5879020	5879177	+
626981	627317	+	5894757	5895150	+
631323	632400	+	5855389	5856570	-
635750	636692	+	5849770	5850751	-
640068	640174	+	5836392	5836498	-
641999	642400	+	5036796	5037234	+
720101	720209	+	6146104	6146211	-
725082	725538	+	4773198	4773654	+
729842	731901	+	6301718	6303965	+
731905	732478	+	6323166	6323803	-
732485	733323	+	6304782	6305701	+
733326	736347	+	6318722	6321773	-
739048	740189	+	6404753	6405974	+
743331	743419	+	6406642	6406728	-
750761	751225	+	6688644	6689157	-
756112	756408	+	6368430	6368725	-
758731	758864	+	6368296	6368429	-
758875	760240	+	6364120	6365504	-
760356	762254	+	6362180	6364079	-
762255	764259	+	6359786	6361798	-
770598	771254	+	6415488	6416154	+
772458	773859	+	6416158	6417555	+
780214	780411	+	6417580	6417776	+
781765	782984	+	6417819	6419066	+
783009	789593	+	6419229	6425846	+
789594	791420	+	6426097	6427958	+
791421	791988	+	6238238	6238804	-
794089	794732	+	6409957	6410583	+
795376	795476	+	6428040	6428140	+
796403	796455	+	2831538	2831590	+
796756	798217	+	6428142	6429644	+
799834	799966	+	6429645	6429777	+
799967	800164	+	6430973	6431175	+
826761	827097	+	3927404	3927737	+
864636	865013	+	6113184	6113566	+
891913	893339	+	6475518	6476946	+
894748	896220	+	6478436	6479946	+
896241	900634	+	6480148	6484654	+
901906	902622	+	6484655	6485368	+
902759	903018	+	6485680	6485937	+
903019	904023	+	6486459	6487416	+
904498	905177	+	6492545	6493269	+
907996	908341	+	3698922	3699267	-
928946	929472	+	2551182	2551752	-
943215	943392	+	6516223	6516442	+
944540	944648	+	6517124	6517233	+
951659	952185	+	6522124	6522641	+
958293	960504	+	5378698	5380893	+

## Sheet: Table S4
Table S4. BLASTn output of RR17 sequence aligned to S. purpurea genome and S. exigua genome.
S. purpurea												S. exigua
qseqid	sseqid	pident	length	mismatch	gapopen	qstart	qend	sstart	send	evalue	bitscore	qseqid	sseqid	pident	length	mismatch	gapopen	qstart	qend	sstart	send	evalue	bitscore
XM_024590879.1	Chr19	77.139	713	102	32	1	684	8302940	8302260	9.02e-97	357	XM_024590879.1	Chr19	84.167	240	12	7	902	1136	9751806	9752024	2.75e-52	209
XM_024590879.1	Chr19	83.333	198	11	11	902	1097	8301035	8300858	2.11e-38	163	XM_024590879.1	Chr19	84.167	240	12	7	902	1136	9969474	9969692	2.75e-52	209
XM_024590879.1	Chr19	82.051	195	10	7	902	1094	8282386	8282557	2.75e-32	143	XM_024590879.1	Chr19	83.75	240	11	8	902	1136	9977894	9977678	4.61e-50	202
XM_024590879.1	Chr19	96	75	3	0	835	909	8282198	8282272	3.58e-26	122	XM_024590879.1	Chr19	83.938	193	21	6	499	681	9750498	9750690	2.79e-42	176
XM_024590879.1	Chr19	91.139	79	7	0	759	837	8282030	8282108	1e-21	108	XM_024590879.1	Chr19	83.938	193	21	6	499	681	9968166	9968358	2.79e-42	176
XM_024590879.1	Chr19	92.308	78	3	1	835	909	8301226	8301149	1e-21	108	XM_024590879.1	Chr19	81.905	210	25	9	485	684	9979235	9979029	6.04e-39	165
XM_024590879.1	Chr19	89.873	79	8	0	759	837	8301394	8301316	4.67e-20	102	XM_024590879.1	Chr19	84.397	141	16	5	1	135	9750046	9750186	1.7e-29	134
XM_024590879.1	Chr19	89.394	66	7	0	683	748	8281869	8281934	1.69e-14	84.2	XM_024590879.1	Chr19	83.688	141	17	4	1	135	9967713	9967853	7.93e-28	128
XM_024590879.1	Chr19	89.394	66	7	0	683	748	8301555	8301490	1.69e-14	84.2	XM_024590879.1	Chr19	83.688	141	17	5	1	135	9979679	9979539	7.93e-28	128
XM_024590879.1	Chr19	81.818	77	14	0	765	841	9442150	9442226	6.12e-09	65.8	XM_024590879.1	Chr19	94.937	79	4	0	759	837	9751443	9751521	1.03e-26	124
XM_024590879.1	Chr19	84.746	59	5	1	916	970	14013759	14013817	3.68e-06	56.5	XM_024590879.1	Chr19	94.937	79	4	0	759	837	9969111	9969189	1.03e-26	124
XM_024590879.1	Chr15Z	77.405	686	92	33	26	684	6249220	6248571	1.51e-94	350	XM_024590879.1	Chr19	94.937	79	4	0	759	837	9978257	9978179	1.03e-26	124
XM_024590879.1	Chr15Z	77.306	683	85	35	26	681	6247206	6247845	3.27e-91	339	XM_024590879.1	Chr19	96	75	3	0	835	909	9751611	9751685	3.69e-26	122
XM_024590879.1	Chr15Z	77.114	402	59	24	63	454	6322942	6323320	4.47e-50	202	XM_024590879.1	Chr19	96	75	3	0	835	909	9969279	9969353	3.69e-26	122
XM_024590879.1	Chr15Z	75.286	437	56	32	64	488	6304833	6304437	7.59e-38	161	XM_024590879.1	Chr19	96	75	3	0	835	909	9978089	9978015	3.69e-26	122
XM_024590879.1	Chr15Z	87.097	93	12	0	587	679	6330563	6330471	3.61e-21	106	XM_024590879.1	Chr19	82.609	115	15	1	205	319	9750230	9750339	2.24e-18	97.1
XM_024590879.1	Chr15Z	86.022	93	13	0	587	679	6322058	6321966	1.68e-19	100	XM_024590879.1	Chr19	82.609	115	15	1	205	319	9967897	9968006	2.24e-18	97.1
XM_024590879.1	Chr15Z	83.871	93	15	0	587	679	6305396	6305488	3.63e-16	89.8	XM_024590879.1	Chr19	85.417	96	7	3	205	300	9979495	9979407	2.89e-17	93.5
XM_024590879.1	Chr15Z	79.545	132	15	6	530	651	6304426	6304297	1.69e-14	84.2	XM_024590879.1	Chr19	89.394	66	7	0	683	748	9751279	9751344	1.74e-14	84.2
XM_024590879.1	Chr15Z	86.301	73	10	0	837	909	6306261	6306333	2.19e-13	80.5	XM_024590879.1	Chr19	89.394	66	7	0	683	748	9968947	9969012	1.74e-14	84.2
XM_024590879.1	Chr15Z	86.301	73	10	0	837	909	6321210	6321138	2.19e-13	80.5	XM_024590879.1	Chr19	89.394	66	7	0	683	748	9978421	9978356	1.74e-14	84.2
XM_024590879.1	Chr15Z	78.788	132	16	6	530	651	6323363	6323492	7.86e-13	78.7	XM_024590879.1	Chr19	81.818	77	14	0	765	841	14303537	14303613	6.31e-09	65.8
XM_024590879.1	Chr15Z	80.22	91	16	2	912	1001	6321096	6321007	1.7e-09	67.6	XM_024590879.1	Chr19	85.246	61	5	3	916	972	19399974	19400034	2.93e-07	60.2
XM_024590879.1	Chr15Z	75	140	27	7	903	1040	6306366	6306499	1.02e-06	58.4	XM_024590879.1	Chr19	81.429	70	11	2	908	976	14303882	14303950	3.8e-06	56.5
XM_024590879.1	Chr15Z	84.483	58	8	1	253	309	6304851	6304908	3.68e-06	56.5	XM_024590879.1	Chr13	77.778	243	40	12	902	1137	12633350	12633115	1.32e-30	137
XM_024590879.1	Chr15W	75.628	677	96	33	43	684	8830115	8829473	3.36e-71	272	XM_024590879.1	Chr13	86.111	72	9	1	838	908	12633531	12633460	2.91e-12	76.8
XM_024590879.1	Chr15W	75.588	680	97	34	37	681	8842199	8842844	3.36e-71	272	XM_024590879.1	Chr13	83.784	74	12	0	759	832	12633655	12633582	1.36e-10	71.3
XM_024590879.1	Chr15W	75.477	681	97	34	37	681	8795476	8796122	4.35e-70	268	XM_024590879.1	Chr13	80.769	78	12	3	684	759	12633828	12633752	1.06e-06	58.4
XM_024590879.1	Chr15W	75.516	678	96	34	43	684	9008949	9008306	4.35e-70	268	XM_024590879.1	Chr15	77.049	183	31	10	500	675	986559	986737	8.04e-18	95.3
XM_024590879.1	Chr15W	84.322	236	15	5	902	1136	8797201	8797415	7.43e-53	211	XM_024590879.1	Chr15	84.211	76	9	3	577	651	985861	985788	1.36e-10	71.3
XM_024590879.1	Chr15W	84.322	236	15	5	902	1136	8843923	8844137	7.43e-53	211	XM_024590879.1	Chr15	83.562	73	12	0	837	909	987512	987584	4.88e-10	69.4
XM_024590879.1	Chr15W	84.322	236	15	5	902	1136	9007230	9007016	7.43e-53	211	XM_024590879.1	Chr15	84.746	59	7	2	253	309	986175	986233	1.06e-06	58.4
XM_024590879.1	Chr15W	84.322	236	14	8	902	1136	8828397	8828184	2.67e-52	209	XM_024590879.1	Chr15	75	140	27	7	903	1040	987617	987750	1.06e-06	58.4
XM_024590879.1	Chr15W	94.937	79	4	0	759	837	8796845	8796923	9.96e-27	124
XM_024590879.1	Chr15W	94.937	79	4	0	759	837	8828753	8828675	9.96e-27	124
XM_024590879.1	Chr15W	94.937	79	4	0	759	837	8843567	8843645	9.96e-27	124
XM_024590879.1	Chr15W	94.937	79	4	0	759	837	9007586	9007508	9.96e-27	124
XM_024590879.1	Chr15W	94.667	75	4	0	835	909	8797013	8797087	1.67e-24	117
XM_024590879.1	Chr15W	94.667	75	4	0	835	909	8828585	8828511	1.67e-24	117
XM_024590879.1	Chr15W	94.667	75	4	0	835	909	8843735	8843809	1.67e-24	117
XM_024590879.1	Chr15W	94.667	75	4	0	835	909	9007418	9007344	1.67e-24	117
XM_024590879.1	Chr15W	89.394	66	7	0	683	748	8796684	8796749	1.69e-14	84.2
XM_024590879.1	Chr15W	89.394	66	7	0	683	748	8828914	8828849	1.69e-14	84.2
XM_024590879.1	Chr15W	89.394	66	7	0	683	748	8843406	8843471	1.69e-14	84.2
XM_024590879.1	Chr15W	89.394	66	7	0	683	748	9007747	9007682	1.69e-14	84.2
XM_024590879.1	Chr13	86.813	91	11	1	902	991	14477151	14477241	1.68e-19	100
XM_024590879.1	Chr13	79.545	132	18	8	1010	1137	14477281	14477407	4.7e-15	86.1
XM_024590879.1	Chr13	87.5	72	8	1	838	908	14476981	14477052	6.08e-14	82.4
XM_024590879.1	Chr13	83.544	79	13	0	759	837	14476854	14476932	1.02e-11	75
XM_024590879.1	Chr01	81.429	70	12	1	774	842	1482991	1482922	3.68e-06	56.5

## Sheet: Table S5
Table S5. Positions of RR17 partial duplicates between S. exigua and S. purpurea
S. purpurea					S. exigua
Partial Duplicates Name	Start Position on P. trichocarpa RR17	End Position on P. trichocarpa RR17	Start Position on Chr15Z	End Position on Chr15Z	Partial Duplicates Name	Start Position on P. trichocarpa RR17	End Position on P. trichocarpa RR17	Start Position on Chr15	End Position on Chr15
Sp2	530	651	6304426	6304297	Se1	577	651	985861	985788
Sp4	253	309	6304851	6304908	Se2	253	309	986175	986233
Sp5	587	679	6305396	6305488	Se3	500	675	986559	986737
Sp6	837	909	6306261	6306333	Se4	837	909	987512	987584
Sp7	903	1040	6306366	6306499	Se5	903	1040	987617	987750

## Sheet: Table S6
Table S6. Shared ancestry among Y, Z, and W implied by similarities on sex-associated alleles.
Alleles from S. purpurea reference				Genotype of S. exigua mother	Alleles from 10 S. purpurea male										Alleles from 12 S. exigua half-sibs X																									Alleles from 12 S. exigua half-sibs Y
CHROM	POS	W-allele	Alt Allele	SE916F	00-01-091	00-01-105	01-01-001	01-01-029	01-01-031	03-01-022	03-01-024	03-01-025	PU119	PU134	SE916-HS102X	SE916-HS26_X	SE916-HS27_X	SE916-HS31_X	SE916-HS35_X	SE916-HS36_X	SE916-HS37_X	SE916-HS39_X	SE916-HS46_X	SE916-HS49_X	SE916-HS50_X	SE916-HS57_X	SE916-HS58_X	SE916-HS59_X	SE916-HS60_X	SE916-HS63_X	SE916-HS68_X	SE916-HS72_X	SE916-HS73_X	SE916-HS75_X	SE916-HS76_X	SE916-HS77_X	SE916-HS84_X	SE916-HS94_X	SE916-HS95_X	SE916-HS08_Y	SE916-HS09_Y	SE916-HS10_Y	SE916-HS11_Y	SE916-HS28_Y	SE916-HS29_Y	SE916-HS30_Y	SE916-HS32_Y	SE916-HS34_Y	SE916-HS40_Y
Chr15W	6278738	A	G	1|1	A	A	A	A	A	A	A	A	A	A	G	G	G	G	G	G	G	G	G	G	G	G	G	G	G	G	G	G	G	G	G	A	G	G	G	A	A	A	A	A	A	A	A	A	A
Chr15W	6278768	G	A	1|1	G	G	G	G	G	G	G	G	G	G	A	A	A	A	A	A	A	A	A	A	A	A	A	A	A	A	A	A	A	A	A	G	A	A	A	G	G	G	G	G	G	G	G	G	G
Chr15W	6277500	T	A	1|1	T	T	T	T	T	T	T	T	T	T	A	A	A	A	A	A	A	A	A	A	A	A	A	A	A	A	A	A	A	A	A	A	A	A	A	T	T	T	T	T	T	T	T	T	T
Chr15W	6341283	C	A	1|1	C	C	C	C	C	C	C	C	C	C	A	A	A	A	A	A	A	A	A	A	A	A	A	A	A	A	A	A	A	A	A	A	A	A	A	C	C	C	C	C	C	C	C	C	C
Chr15W	6468236	G	A	1|1	G	G	G	G	G	G	G	G	G	G	A	A	A	A	A	A	A	A	A	A	A	A	A	A	A	A	A	A	A	A	A	A	A	A	A	G	G	G	G	G	G	G	G	G	G
Chr15W	7308166	A	G	1|1	A	A	A	A	A	A	A	A	A	A	G	G	G	G	G	G	G	G	G	G	G	G	G	G	G	G	G	G	G	G	G	G	G	G	G	A	A	A	A	A	A	A	A	A	A
Chr15W	7308168	C	A	1|1	C	C	C	C	C	C	C	C	C	C	A	A	A	A	A	A	A	A	A	A	A	A	A	A	A	A	A	A	A	A	A	A	A	A	A	C	C	C	C	C	C	C	C	C	C
Chr15W	7334961	A	T	1|1	A	A	A	A	A	A	A	A	A	A	T	T	T	T	T	T	T	T	T	T	T	T	T	T	T	T	T	T	T	T	T	T	T	T	T	A	A	A	A	A	A	A	A	A	A
Chr15W	7338400	A	G	1|1	A	A	A	A	A	A	A	A	A	A	G	G	G	G	G	G	G	G	G	G	G	G	G	G	G	G	G	G	G	G	G	G	G	G	G	A	A	A	A	A	A	A	A	A	A
Chr15W	7338458	A	G	1|1	A	A	A	A	A	A	A	A	A	A	G	G	G	G	G	G	G	G	G	G	G	G	G	G	G	G	G	G	G	G	G	G	G	G	G	A	A	A	A	A	A	A	A	A	A
Chr15W	7352217	T	A	1|1	T	T	T	T	T	T	T	T	T	T	A	A	A	A	A	A	A	A	A	A	A	A	A	A	A	A	A	A	A	A	A	A	A	A	A	T	T	T	T	T	T	T	T	T	T
Chr15W	7373897	A	G	1|1	A	A	A	A	A	A	A	A	A	A	G	G	G	G	G	G	G	G	G	G	G	G	G	G	G	G	G	G	G	G	G	G	G	G	G	A	A	A	A	A	A	A	A	A	A
Chr15W	7387078	G	A	1|1	G	G	G	G	G	G	G	G	G	G	A	A	A	A	A	A	A	A	A	A	A	A	A	A	A	A	A	A	A	A	A	A	A	A	A	G	G	G	G	G	G	G	G	G	G
Chr15W	7387090	A	C	1|1	A	A	A	A	A	A	A	A	A	A	C	C	C	C	C	C	C	C	C	C	C	C	C	C	C	C	C	C	C	C	C	C	C	C	C	A	A	A	A	A	A	A	A	A	A
Chr15W	7580404	T	A	1|1	T	T	T	T	T	T	T	T	T	T	A	A	A	A	A	A	A	A	A	A	A	A	A	A	A	A	A	A	A	A	A	A	A	A	A	T	T	T	T	T	T	T	T	T	T
Chr15W	7580406	A	G	1|1	A	A	A	A	A	A	A	A	A	A	G	G	G	G	G	G	G	G	G	G	G	G	G	G	G	G	G	G	G	G	G	G	G	G	G	A	A	A	A	A	A	A	A	A	A
Chr15W	7582930	T	A	1|1	T	T	T	T	T	T	T	T	T	T	A	A	A	A	A	A	A	A	A	A	A	A	A	A	A	A	A	A	A	A	A	A	A	A	A	T	T	T	T	T	T	T	T	T	T
Chr15W	6059052	C	T	1|1	C	C	C	C	C	C	C	C	C	C	T	T	T	T	T	T	T	T	T	T	T	T	T	T	T	T	T	T	T	T	T	T	T	T	T	C	C	C	C	C	C	C	C	C	C
Chr15W	8359542	G	A	1|1	G	G	G	G	G	G	G	G	G	G	A	A	A	A	A	A	A	A	A	A	A	A	A	A	A	A	A	A	A	A	A	A	A	A	G	G	G	G	G	A	G	G	G	G	G
Chr15W	7289474	G	T	1|1	G	G	G	G	G	G	G	G	G	G	T	T	T	T	T	T	T	T	T	T	T	T	T	T	T	T	T	T	T	T	T	T	T	T	T	G	G	G	G	G	G	G	G	T	G
Chr15W	8352593	C	A	1|1	C	C	C	C	C	C	C	C	C	C	A	A	A	A	A	A	A	A	A	A	A	A	A	A	A	A	A	A	A	A	A	A	A	A	A	C	C	C	C	A	C	C	C	C	C
Chr15W	8359191	C	T	1|1	C	C	C	C	C	C	C	C	C	C	T	T	T	T	T	T	T	T	T	T	T	T	T	T	T	T	T	T	T	T	T	T	T	T	T	C	C	C	C	T	C	C	C	C	C
Chr15W	8359477	T	G	1|1	T	T	T	T	T	T	T	T	T	T	G	G	G	G	G	G	G	G	G	G	G	G	G	G	G	G	G	G	G	G	G	G	G	G	G	T	T	T	T	G	T	T	T	T	T
Chr15W	7289429	T	C	1|1	T	T	T	T	T	T	T	T	T	T	C	C	C	C	C	C	C	C	C	C	C	C	C	C	C	C	C	C	C	C	C	C	C	C	C	T	T	T	C	T	T	T	T	C	T
Chr15W	8312500	G	T	0|0	T	T	T	T	T	T	T	T	T	T	T	G	G	T	G	G	T	T	T	G	G	T	T	T	T	T	G	G	T	T	G	T	T	T	T	G	T	T	T	G	T	T	T	T	T
Chr15W	8312503	G	T	1|1	G	G	G	G	G	G	G	G	G	G	T	G	G	T	G	G	T	T	T	G	G	T	T	T	T	T	G	G	T	T	G	T	T	T	T	G	T	T	T	G	T	T	T	T	T
Chr15W	8312508	A	G	1|1	A	A	A	A	A	A	A	A	A	A	G	A	A	G	A	A	G	G	G	A	A	G	G	G	G	G	A	A	G	G	A	G	G	G	G	A	G	G	G	A	G	G	G	G	G
Chr15W	8326228	C	T	0|0	T	T	T	T	T	T	T	T	T	T	T	C	C	T	C	C	T	T	T	C	C	T	T	T	T	T	C	C	T	T	C	T	T	T	T	C	T	T	T	C	T	T	T	T	T
Chr15W	8345826	T	A	0|0	A	A	A	A	A	A	A	A	A	A	A	T	T	A	T	T	A	A	A	T	T	A	A	A	A	A	T	T	A	A	T	A	A	A	A	A	A	A	A	T	A	A	A	A	A
Chr15W	8346031	T	A	0|0	A	A	A	A	A	A	A	A	A	A	A	T	T	A	T	T	A	A	A	T	T	A	A	A	A	A	T	T	A	A	T	A	A	A	A	A	A	A	A	T	A	A	A	A	A
[truncated: 9 more columns]
